# Supplementary material for: Facile one-pot synthesis of β-cyclodextrin-polymer-modified Fe3O4microspheres for stereoselective absorption of amino acid compounds
Source: Royal Society of Chemistry journal article supplement (doi:10.1039/c5ay00013k), 2015-01-01
Supplement: c5ay00013k1.pdf [file c5ay00013k1.pdf]

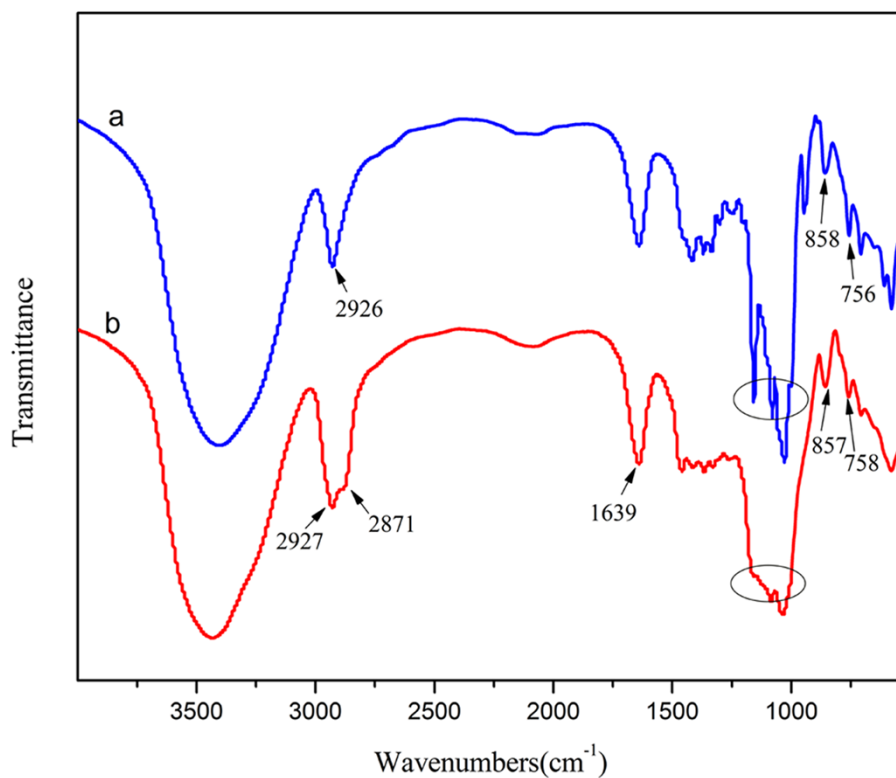

Figure S1 FT-IR spectra of (a) β-CD and (b) β-CDEP.

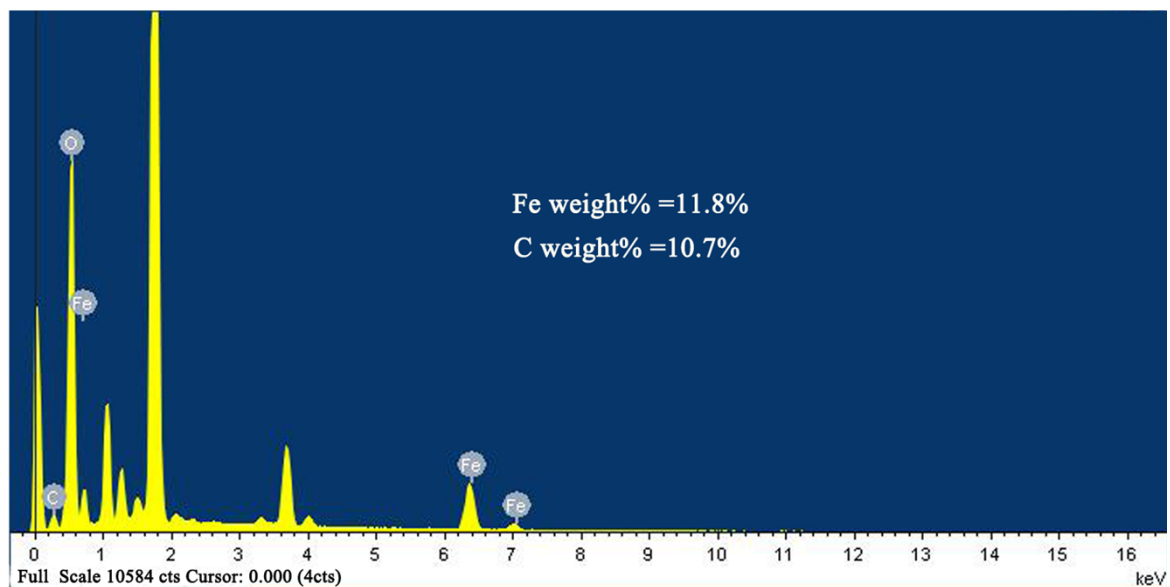

Figure S2 Contents of iron and carbon elements in β-CDEP-modified Fe<sub>3</sub>O<sub>4</sub> microspheres by EDX spectroscopy analysis.
